1       **GSTZ1 sensitizes hepatocellular carcinoma cells to sorafenib-induced**

2                                   **ferroptosis via inhibition of NRF2/GPX4 axis**

3       **Running title:** GSTZ1 sensitizes HCC to sorafenib-induced ferroptosis

4       Qiujie Wang<sup>1,\*</sup>, Bin Cheng<sup>1,\*</sup>, Qiang Xue<sup>2,\*</sup>, Qingzhu Gao<sup>1</sup>, Ailong Huang<sup>1,#</sup>,

5       Kai Wang<sup>1,#</sup>, Ni Tang<sup>1,#</sup>

6       <sup>1</sup>Key Laboratory of Molecular Biology for Infectious Diseases (Ministry of  
7       Education), Institute for Viral Hepatitis, Department of Infectious Diseases, The  
8       Second Affiliated Hospital, Chongqing Medical University, Chongqing, China

9       <sup>2</sup>Department of Hepatobiliary Surgery, The Second Affiliated Hospital of  
10       Chongqing Medical University, Chongqing, China

11       \*These authors contributed equally to this work.

12       #**Correspondence:** Ailong Huang, Kai Wang, Ni Tang, Key Laboratory of  
13       Molecular Biology for Infectious Diseases (Ministry of Education), Institute for  
14       Viral Hepatitis, Department of Infectious Diseases, The Second Affiliated  
15       Hospital, Chongqing Medical University, Chongqing, China. Phone:

16       86-23-68486780, Fax: 86-23-68486780, E-mail: nitang@cqmu.edu.cn (N.T.),

17       ahuang@cqmu.edu.cn (A.L.H.), wangkai@cqmu.edu.cn (K.W.)

18

19       **Conflict of interest**

20       The authors declare no conflict of interest.

21

22 **Abstract**

23 Increasing evidence supports that ferroptosis plays an important role in tumor growth  
24 inhibition. Sorafenib, originally identified as an inhibitor of multiple oncogenic kinases,  
25 has been shown to induce ferroptosis in hepatocellular carcinoma (HCC). However,  
26 some hepatoma cell lines are less sensitive to sorafenib-induced ferroptotic cell death.  
27 Glutathione S-transferase zeta 1 (GSTZ1), an enzyme in the catabolism of  
28 phenylalanine, has been found to negatively regulate the master regulator of cellular  
29 redox homeostasis nuclear factor erythroid 2-related factor 2 (NRF2). This study  
30 aimed to investigate the role of GSTZ1 in sorafenib-induced ferroptosis in HCC cell  
31 lines and determine the involved molecular mechanisms. Mechanistically, GSTZ1  
32 depletion enhanced the activation of the NRF2 pathway and increased the glutathione  
33 peroxidase 4 (GPX4) level, thereby suppressing sorafenib-induced ferroptosis. The  
34 combination of sorafenib and RSL3, a GPX4 inhibitor, significantly inhibited GSTZ1  
35 deficient cell viability and promoted ferroptosis, accompanied with ectopic increases  
36 of iron and lipid peroxides. An *in vivo* experiment showed that the combination of  
37 sorafenib and RSL3 had a synergic therapeutic effect on HCC progression in *Gstz1*<sup>-/-</sup>  
38 mice. In conclusion, GSTZ1 was significantly downregulated in sorafenib resistant  
39 hepatoma cells. GSTZ1 enhanced sorafenib-induced ferroptosis by inhibiting the  
40 NRF2/GPX4 axis in HCC cells. GSTZ1 deficiency was resistant to sorafenib-induced  
41 ferroptosis and is, therefore, a potential therapeutic approach for treating HCC by  
42 synergizing sorafenib and RSL3 to induce ferroptosis.

43

## 44 **Introduction**

45 Hepatocellular carcinoma (HCC) is the fourth leading cause of cancer-related  
46 death worldwide <sup>1</sup>. In the early stages of HCC, curative treatment can be  
47 achieved with tumor ablation, resection, or liver transplantation <sup>2</sup>. However,  
48 majority of HCC patients are already in the middle-late stage when diagnosed;  
49 thus, the optimal period for curative treatment is missed. Sorafenib, a  
50 multi-target kinase inhibitor, has been confirmed to prolong the survival of  
51 advanced HCC patients to 6.5 months in phase III trial <sup>3</sup>. Thus, it has been  
52 approved by the Food and Drug Agency as a first-line treatment for advanced  
53 HCC. However, several patients with advanced HCC have limited survival  
54 benefit due to acquired resistance to sorafenib, leading to a high recurrence  
55 rate <sup>4</sup>. Therefore, the mechanism of sorafenib resistance needs to be explored,  
56 and new molecular targets should be identified.

57

58 Ferroptosis is a newly described programmed form of cell death characterized  
59 by iron-dependent accumulation of lipid peroxides to lethal amounts, different  
60 from the traditional cell death forms of apoptosis, necroptosis, and autophagy <sup>5</sup>.  
61 Growing evidence indicates that ferroptosis can be induced by the inhibition of  
62 cystine/glutamate transporter (SLC7A11/xCT) activity, downregulation of  
63 glutathione peroxidase 4 (GPX4), and accumulation of iron and lipid reactive  
64 oxygen species (ROS) <sup>6-8</sup>. Recent reports have shown that sorafenib could  
65 induce ferroptosis; thus, targeting ferroptosis to improve sorafenib therapy

66 might be a new promising strategy for HCC treatment<sup>9-11</sup>.

67

68 Glutathione S-transferases (GSTs) is a class of phase II detoxification

69 enzymes that catalyze the conjugation of glutathione (GSH) to endogenous or

70 exogenous electrophilic compounds<sup>12</sup>. GSTs, including GSTM and GSTP<sup>13-15</sup>,

71 are involved in the development of chemotherapy resistance<sup>16,17</sup>. Glutathione

72 S-transferase zeta 1 (GSTZ1) is an important member of the GST superfamily.

73 It participates in the catabolism of phenylalanine/tyrosine and catalyzes the

74 isomerization of maleylacetoacetate to fumarylacetoacetate<sup>18</sup>. We previously

75 found that GSTZ1 was poorly expressed in HCC, and GSTZ1 deficiency could

76 lead to metabolite succinylacetone accumulation and thereby activate the

77 NRF2 signaling pathway<sup>19,20</sup>. Considering the importance of GSTZ1 in the

78 development and progression of HCC, GSTZ1 may be an anticancer hallmark

79 for sorafenib resistance in HCC. Therefore, it is crucial to investigate the role of

80 GSTZ1 in chemotherapeutic resistance and elucidate underlying mechanisms.

81 In the present study, we investigated the role of GSTZ1 in sorafenib-induced

82 ferroptosis in HCC cell lines *in vitro* and in *Gstz1*-knockout mice *in vivo*, and

83 determined the involved molecular mechanisms. Our study not only identify a

84 novel mechanism of sorafenib resistance but also suggest a new link between

85 GSTZ1 and ferroptosis.

86

## 87 **Results**

### 88 **GSTZ1 is downregulated in sorafenib-resistant HCC**

89 To investigate the molecular mechanism of sorafenib resistance in HCC, we  
90 generated sorafenib-resistant (SR) HCC cell lines *in vitro*. Resistance was  
91 achieved by gradually increasing the concentration of sorafenib in the medium  
92 over repeated passages<sup>21</sup>. Finally, resistant HepG2 and SNU449 cell lines  
93 were established. We confirmed the acquired resistance of these resistant  
94 cells named HepG2-SR and SUN449-SR toward sorafenib by comparing to  
95 the parental cells. The half maximal inhibitory concentrations (IC<sub>50</sub>) of  
96 HepG2-SR and SNU449-SR cells to sorafenib were 2-3 times higher than that  
97 of the parental cells at 17.09 μM and 15.43 μM respectively (Fig. 1A). In  
98 addition, we evaluated the cell viability of sensitive and resistant cells treated  
99 with sorafenib over a series of time points or at different concentrations for 24h  
100 and found that the SR cells became less sensitive to sorafenib (Fig. 1B-C). To  
101 verify the role of GSTZ1 in sorafenib-resistant HCC, we comprehensively  
102 analyzed the expression levels of GSTZ1 in HepG2 cells and HepG2 cells  
103 resistant to sorafenib in GSE62813 databases. The results showed that  
104 GSTZ1 was significantly downregulated in SR cells (Fig. 1D). Subsequently,  
105 we further validated the low levels of GSTZ1 expression in SR cell lines via  
106 quantitative reverse-transcription polymerase chain reaction (qRT-PCR) and  
107 Western blotting (Fig. 1E-F). Together, these data indicate that GSTZ1 may  
108 play a negative role in mediating the resistance to sorafenib in HCC cells.

109

110 **GSTZ1 Knockout promotes sorafenib resistance in HCC**

111 To further evaluate whether GSTZ1 is related to sorafenib-resistance in HCC,  
112 we found that overexpression of GSTZ1 through an adenovirus system<sup>19,20</sup>  
113 increased the sensitivity of HCC cells to sorafenib and inhibited cell  
114 proliferation via morphological observation. Conversely, knockout of GSTZ1 in  
115 HepG2 and SNU449 cells via the CRISPR-Cas9 system<sup>19,20</sup> decreased the  
116 drug sensitivity and weakened the growth inhibition effect of sorafenib (Fig.  
117 2A-B). Next, we analyzed the cell viability of GSTZ1 overexpression (OE) and  
118 knockout (KO) cells treated with sorafenib over a series of time points or at  
119 different concentrations for 24 h by cell growth curve. As expected, GSTZ1  
120 overexpression significantly enhanced the sensitivity of HCC cell lines to  
121 sorafenib (Fig. 2C-D). No surprisingly, the IC<sub>50</sub> value of GSTZ1-OE cells was  
122 decreased compared to that of the control groups, whereas the IC<sub>50</sub> value of  
123 GSTZ1-KO groups was increased (Fig. 2E-F). Taken all together, our results  
124 showed that GSTZ1 deficiency enhanced sorafenib resistance in HCC.

125

126 **GSTZ1 overexpression enhances sorafenib-induced ferroptosis in HCC**

127 Recent studies indicate that ferroptosis plays a key role in the  
128 chemoresistance of human cancers<sup>22-24</sup>. We confirmed that sorafenib-induced  
129 cell death in HCC cell lines was blocked by ferrostatin-1 (Fer-1, an inhibitor of  
130 ferroptosis), deferoxamine (DFO, an iron chelator), and N-acetyl-L-cysteine

131 (NAC, an antioxidant), but not by bafilomycin A1 (Baf-A1, an inhibitor of  
132 autophagy), ZVAD-FMK, and necrosulfonamide (Nec, an inhibitor of  
133 necroptosis). This suggested that ferroptosis, rather than apoptosis, is  
134 essential for sorafenib-induced cell death in HCC (Supplementary Fig. 1A),  
135 consistent with previous studies<sup>11,25,26</sup>. To determine whether GSTZ1 played a  
136 role in ferroptosis to reduce sorafenib resistance in HCC, transmission electron  
137 microscopy (TEM) was used to observe the morphological changes in  
138 sorafenib-induced HCC cells with or without GSTZ1 depletion. GSTZ1-OE  
139 cells treated with sorafenib displayed smaller mitochondria, diminished or  
140 vanished mitochondria crista, and condensed mitochondrial membrane  
141 densities compared to parental cells, whereas GSTZ1-KO alleviated the  
142 abnormalities of mitochondrial morphology and cell death induced by sorafenib  
143 (Fig. 3A). To further verify this observation, we measured ROS, iron and lipid  
144 peroxidation levels, which are the primary cause of ferroptosis<sup>27</sup>, after  
145 interference with GSTZ1 expression. Results showed that GSTZ1  
146 overexpression significantly increased ROS, iron, and MDA level accumulation  
147 in sorafenib-induced HCC cell lines (Fig. 3B-D and Supplementary Fig. 1B-C),  
148 whereas GSTZ1 knockout decreased their levels. In addition, we assessed  
149 mRNA and protein expression levels of ferroptosis-associated genes. Results  
150 showed that GSTZ1-OE decreased the expression levels of ferroptosis-related  
151 genes in sorafenib or erastin (an inducer of ferroptosis)-induced hepatoma  
152 cells, including *GPX4*, *FTL*, and *SLC7A11*. In contrast, GSTZ1-KO increased

153 the levels of these above genes (Fig. 3E-G and Supplementary Fig. 1D-E).  
154 Interestingly, ferroptosis-associated genes were also enhanced in HepG2-SR  
155 and SNU449-SR cells (Fig. 4A-B), which had relatively lower levels of GSTZ1  
156 than the parental cells. Meanwhile, GSTZ1 overexpression in drug-resistant  
157 cells reduced the levels of ferroptosis-related genes (Fig. 4C), increased the  
158 accumulation of iron and MDA levels, and enhanced the inhibition of sorafenib  
159 to resistant cells (Fig. 4D-F), consistent with the sorafenib-sensitive cells.  
160 To further identify the role of ferroptosis in sorafenib resistance caused by  
161 GSTZ1 deficiency, we examined the curative effects of sorafenib by  
162 intervention of ferroptosis. We observed that ferrostatin-1 inhibited  
163 sorafenib-induced GSTZ1-OE cell death, whereas erastin promoted  
164 GSTZ1-KO cell death (Fig. 4G). These results suggested that GSTZ1  
165 increased the sensitivity of hepatoma cells to sorafenib by inducing ferroptosis.

166

167 **GSTZ1 sensitizes hepatoma cells to sorafenib-induced ferroptosis**  
168 **through the NRF2 signaling pathway**

169 Previous studies have shown that GSTZ1 deficiency activated NRF2 pathway  
170 <sup>19,20</sup>. Activation of NRF2 pathway plays a critical role in protecting HCC cells  
171 against sorafenib-induced ferroptosis <sup>26</sup>. To verify whether GSTZ1 regulated  
172 sorafenib-induced ferroptosis through the NRF2 signaling pathway, we  
173 blocked the NRF2 pathway using brusatol (an inhibitor of NRF2) or  
174 Flag-tagged Kelch-like ECH-associated protein 1 (KEAP1) <sup>28</sup> (an cytosolic



175 inhibitor of NRF2) in GSTZ1-KO cells and observed the characteristic  
176 indicators related to ferroptosis, including MDA, iron, ROS, and 4-HNE levels.  
177 Unexpectedly, the results demonstrated that NRF2 inhibition significantly  
178 increased the accumulation of these indicators in GSTZ1-KO cells (Fig. 5A-D  
179 right, Fig. 5E-F bottom, and Supplementary Fig. 2A-C bottom), whereas NRF2  
180 activation using tertiary butylhydroquinone (tBHQ, an activator of NRF2) and  
181 Myc-tagged NRF2 yielded opposite results in GSTZ1-OE cells (Fig. 5A-D left,  
182 Fig. 5E-F top and Supplementary Fig. 2A-C top). Moreover, the morphological  
183 images also indicated that NRF2 inhibition increased the efficiency of  
184 sorafenib for growth inhibition in GSTZ1-depleted HCCs, whereas NRF2  
185 activation decreased that in GSTZ1-OE cells (Fig. 6A). Importantly, the protein  
186 levels of ferroptosis-related genes were changed accordingly in GSTZ1-OE  
187 and -KO cells when treated with tBHQ or brusatol via Western blotting (Fig. 6B  
188 and Supplementary Fig. 2D). The above data suggested that GSTZ1 depletion  
189 alleviated sorafenib-induced ferroptosis via activation of the NRF2 pathway.  
190 As GPX4 is involved in ferroptosis and a transcriptional target gene of NRF2  
191 <sup>29,30</sup>, we utilized RSL3 to further examine whether ferroptosis is involved in the  
192 sensitivity of HCC cells to sorafenib. Interestingly, GPX4 inactivation enhanced  
193 sorafenib-induced ferroptosis and inhibited cell growth in GSTZ1-KO (Fig.  
194 6C-E) and SR cells (Fig. 6F-H). Collectively, these findings indicated that the  
195 inhibition of NRF2 could markedly sensitize GSTZ1-deficient hepatoma cells to  
196 sorafenib treatment. Furthermore, we further examined targeting GPX4 could

197 also improve the response of hepatoma cells to sorafenib.

198

199 **RSL3 enhances the anticancer activity of sorafenib in *Gstz1*<sup>-/-</sup> mice**

200 To further investigated the role of GSTZ1 in mediating sorafenib resistance in

201 HCC progression *in vivo*, we established the mouse model of liver cancer

202 induced by DEN/CCl<sub>4</sub> as our previous induction method<sup>20</sup> and drug

203 administration with three regimens: DMSO, sorafenib (30mg/kg, every 2 days

204 for 4 weeks), RSL3 (10mg/kg, every 2 days for 4 weeks) (Fig. 7A). Compared

205 with wild type (WT) mice, *Gstz1* knockout significantly reduced the inhibitory

206 effects of sorafenib treatment *in vivo* than that in WT mice, as indicated by the

207 increased tumor sizes and number of tumor nodules and higher level of

208 alanine aminotransferase (ALT) in serum (Fig. 7B-E). Moreover, sorafenib

209 combined with RSL3 had a more significant protective effect on tumorigenesis

210 in *Gstz1*<sup>-/-</sup> mice than sorafenib alone. To substantiate the role of GSTZ1 in

211 regulating ferroptosis-mediated sorafenib resistance *in vivo*, we detected the

212 levels of iron, 4-HNE modification, MDA, ROS and ferroptosis-associated gene

213 expression mRNA and protein in the liver tumor tissues. Consistent with the

214 results *in vitro*, *Gstz1* knockout decreased the sensitivity of HCC to sorafenib

215 by weakening ferroptosis. Meanwhile, RSL3/sorafenib combination treatment

216 reduced drug resistance caused by GSTZ1 depletion (Fig. 7F-J and

217 Supplementary Fig. 3A). Furthermore, histological analysis indicated that the

218 cytoplasm and nuclei of liver tumors in the combination treatment groups

219 exhibited weaker immunoreactivity for GPX4 and Ki67 respectively than that in  
220 sorafenib-alone groups. RSL3 significantly enhanced the inhibitory effects of  
221 sorafenib on cell proliferation in *Gstz1*<sup>-/-</sup> mice, which was highly consistent  
222 with the in vitro results (Fig. 7K). These results indicate that targeting the  
223 NRF2/GPX4 axis using RSL3 significantly enhances sorafenib-induced  
224 ferroptosis and inhibits hepatocarcinogenesis *in vivo*.  
225

## 226 **Discussion**

227 The incidence of HCC continues to increase globally, and HCC remains to  
228 have high incidence and mortality rates<sup>31</sup>. Sorafenib resistance remains a  
229 treatment challenge in HCC and leads to poor prognosis<sup>32</sup>. Therefore, the  
230 comprehensive elucidation of the underlying mechanism of sorafenib  
231 resistance in HCC may improve the curative effect of chemotherapy and guide  
232 the clinical medication. Herein, we found that GSTZ1 depletion activated the  
233 NRF2/GPX4 pathway and inhibited sorafenib-induced cell death, accompanied  
234 by the compromised accumulation of iron level, lipid peroxidation, and  
235 subsequent ferroptosis. Hence, blocking the NRF2/GPX4 pathway to enhance  
236 the anticancer activity of sorafenib by inducing ferroptosis represents a  
237 promising therapeutic strategy for the treatment of HCC (Fig. 8).

238

239 GSTs are phase II detoxification enzymes that play important roles in  
240 protecting cellular macromolecules from both oxidative stress and  
241 carcinogenic electrophiles<sup>33</sup>. The major roles of GSTs in the detoxification of  
242 xenobiotics predicts their important role in drug resistance. Tumor cells may  
243 develop resistance to alkylating anticancer drugs by increasing the levels of  
244 GSTs<sup>34</sup>. Several subclasses in the GST family contribute to chemoresistance  
245 in various cancers<sup>15,35-40</sup>. GSTM1 was reported to be a predictive biomarker  
246 for the efficacy of chemotherapy in breast cancer and ovarian cancer<sup>15,35</sup>.  
247 GSTP expression was also correlated with platinum drug chemosensitivity and

248 prognosis in ovarian cancer, pancreatic ductal adenocarcinoma, and lung  
249 cancer<sup>36–39</sup>. As a member of the GST family, GSTZ1 plays a similar  
250 detoxification role, but it is independently characterized as a  
251 maleylacetoacetate isomerase (MAAI), which is essential for phenylalanine  
252 metabolism<sup>18</sup>. We previously reported that GSTZ1 is downregulated in HCC,  
253 leading to increased accumulation of the carcinogenic metabolite  
254 succinylacetone and activation of the NRF2/IGFIR pathways through  
255 inactivation of KEAP1<sup>19</sup>. The current study demonstrates that GSTZ1 is also  
256 downregulated in sorafenib-resistant HCC cells. Furthermore, re-expression of  
257 GSTZ1 enhances the sensitivity of HCC cells to sorafenib treatment, indicating  
258 the negative role of GSTZ1 in sorafenib resistance.

259

260 Iron is an essential element for the synthesis of iron sulfur clusters, serving an  
261 important role in numerous cellular processes<sup>41</sup>. Cancer cells exhibit a higher  
262 dependence on iron than normal cells<sup>42</sup>, making them more susceptible to  
263 iron-catalyzed necrosis. This form of cell death was first defined as ferroptosis  
264 in 2012<sup>5</sup>, which characterized by the accumulation of lipid peroxidation  
265 products and lethal ROS derived from iron metabolism<sup>6,27</sup>. An increasing  
266 number of small molecule compounds (e.g., erastin) or clinical drugs (e.g.,  
267 sulfasalazine) has been found to induce ferroptosis by modulating iron  
268 metabolism and enhancing the accumulation of lipid peroxidation<sup>6,43</sup>. As a  
269 homeostatic dysfunction of ferroptosis is believed to be an essential cause of

270 chemoresistance<sup>44</sup>, it is crucial to explore how to enhance the sensitivity of  
271 cancer cells to clinical chemotherapy drugs by triggering ferroptosis. In the  
272 case, ferroptosis inducer erastin significantly enhances the anticancer activity  
273 of cytarabine and doxorubicin in leukemia cells<sup>45</sup>. It also reverses the  
274 resistance of ovarian cancer cells to cisplatin<sup>46</sup>. Multiple studies recently  
275 verified that sorafenib plays an important role in inducing ferroptosis. Herein,  
276 we found that GSTZ1 deficiency aggravated the resistance to  
277 sorafenib-induced ferroptosis by preventing iron accumulation and lipid  
278 peroxidation production and decreasing the ROS level. In contrast, GSTZ1  
279 overexpression increased the sensitivity of HCC cells to sorafenib by  
280 facilitating ferroptosis *in vitro*. Previous studies found that sorafenib-induced  
281 hepatoma cell death is mainly dependent on triggering ferroptosis by inhibiting  
282 of SLC7A11/xCT<sup>10,11,24</sup>, and consistent findings were observed in this study.  
283 As such, inducing ferroptosis may be a promising strategy for enhancing the  
284 sensitivity of tumor cells to chemotherapy. Haloperidol, a sigma-1 receptor  
285 (S1R) antagonist, promotes sorafenib-induced ferroptotic death by increasing  
286 ROS accumulation<sup>47</sup>. Meanwhile, metallothionein-1G silencing (MT-1G) was  
287 reported to enhance the sensitivity of hepatoma cells to sorafenib by triggering  
288 ferroptosis<sup>24</sup>. Collectively, our findings and those of previous studies suggest  
289 that ferroptosis plays an important role in the anti-tumor efficacy of sorafenib.  
290 Further, our data indicated that GSTZ1 plays a positive regulatory role in  
291 ferroptosis during sorafenib treatment.

292

293 Changes in certain metabolic pathways are also involved in the regulation of  
294 cell sensitivity to ferroptosis, including coenzyme Q10 consumption <sup>48</sup>,  
295 decreased intracellular reducer such as NADPH <sup>49</sup>, and altered iron  
296 metabolism <sup>50</sup>. Many components of the ferroptosis cascade are target genes  
297 of the transcription factor NRF2, indicating the critical role of the NRF2  
298 pathway in mediating ferroptotic response <sup>29,30,51</sup>. For example, the inhibition of  
299 p62-Keap1-NRF2 pathway significantly enhanced the anticancer activity of  
300 erastin and sorafenib by inducing ferroptosis in HCC cells *in vitro* and *in vivo*  
301 [27]. Consistent with previous reports, our results demonstrated that GSTZ1  
302 deficiency markedly reduces sorafenib-induced ferroptotic cell death by  
303 increasing the level of NRF2 and ferroptosis-related genes including GPX4,  
304 SLC7A11, and FTL. In contrast, pharmacological- or Keap1-mediated  
305 inhibition of NRF2 increases the sensitivity of GSTZ1-deficient cells to  
306 sorafenib by enhancing ferroptosis *in vitro*. Meanwhile, GPX4 is the only  
307 reported enzyme that is capable of directly reducing complex phospholipid  
308 hydroperoxides and is a downstream target gene of NRF2. Therefore,  
309 targeting GPX4 is currently considered to be a crucial strategy for triggering  
310 ferroptosis <sup>7,44</sup>. Mechanistically, we verified that GSTZ1 knockout inhibited  
311 sorafenib-induced ferroptosis by activation of the NRF2/GPX4 axis *in vitro* and  
312 *in vivo*. Moreover, targeting GPX4 using RSL3 in GSTZ1-knockout and  
313 sorafenib-resistant HCC cells significantly increased iron accumulation, ROS

314 level, and lipid peroxidation production and enhanced sorafenib-induced  
315 inhibition of cell proliferation. Importantly, GPX4 inhibition using RSL3 with  
316 sorafenib therapy elicited a significant tumor regression in *Gstz1*<sup>-/-</sup> mouse  
317 models *in vivo*.

318

319 To our best knowledge, this is the first study to explore the role of GSTZ1 in  
320 sorafenib resistance in HCC. Our findings provide new insights into the  
321 molecular basis of the role of GSTZ1 in sorafenib resistance, and indicate that  
322 sorafenib combined with RSL3 can synergistically overcome acquired  
323 resistance to sorafenib and improve the anticancer efficacy of sorafenib in  
324 HCC. Blocking the NRF2/GPX4 axis may have a therapeutic benefit in HCC  
325 patients with GSTZ1 deficiency. Our findings also demonstrate the sensitizing  
326 role of RSL3 for enhancing sorafenib effectiveness. Importantly, GSTZ1  
327 deficiency was resistant to sorafenib-induced ferroptosis and is therefore a  
328 potential therapeutic approach for treating HCC by synergizing sorafenib and  
329 RSL3 to induce ferroptosis.

330



331 **Materials and Methods**

332 **Cell lines**

333 Human hepatoma cell lines SK-Hep1, HepG2 and SNU449 were directly  
334 obtained from American Type Culture Collection (ATCC, VA, USA). Huh7 cells  
335 were obtained from Cell Bank of the Chinese Academy of Sciences (Shanghai,  
336 China). These cells were cultured in Dulbecco's modified Eagle's medium  
337 (SK-Hep1, HepG2, Huh7) or RPMI 1640 medium (SNU449) supplemented  
338 with 10% fetal bovine serum (FBS; Gibco, Rockville, MD, USA), 100units/mL  
339 penicillin and 100mg/mL streptomycin in a humidified incubator at 37 °C  
340 containing 5% CO<sub>2</sub>.

341

342 **Reagents and antibodies**

343 Erastin (HY-15763), Ferrostatin-1 (HY-100579), Deferoxamine (HY-B0988)  
344 and Necrosulfonamide (HY-100573) were purchased from MedChemExpress  
345 (MCE; Shanghai, China). Sorafenib (S7397), ZVAD-FMK (S7023), Bafilomycin  
346 A1 (S1413) and RSL3 (S8155) were obtained from Selleckchem (Houston, TX,  
347 USA). N-acetyl-L-cysteine (NAC, S0077) was from Beyotime (Shanghai,  
348 China). Brusatol (Bru, MB7292) was obtained from Meilunbio (Dalian, China).  
349 Tertiary butylhydroquinone (tBHQ, 112941) was obtained from Sigma  
350 (Shanghai, China). Antibodies raised against GPX4 (ab125066), NRF2  
351 (ab62352), 4-HNE(ab46545), NQO1(ab34173) and  $\beta$ -actin (ab6276) were  
352 obtained from Abcam (Cambridge, MA, USA), anti-SLC7A11 (NB300-318) was

353 from Novusbio (Centennial, CO, USA), anti-FTL (10727-1-AP) was from  
354 Proteintech (Shanghai, China), and anti-GSTZ1 (GTX106109) was from  
355 GeneTex (San Antonio, CA, USA).

356

### 357 **Generation of sorafenib-resistant cell lines**

358 To establish sorafenib-resistant cells, HepG2 and SNU449 cells were cultured  
359 by exposing cells with sorafenib at 5% of IC50 concentration and the  
360 concentration was gradually increased at 10% of IC50 until the maximum  
361 tolerated doses (10  $\mu$ M) have been reached. Sorafenib-resistant cells  
362 (HepG2-SR and SNU449-SR) were cultured continuously at 1  $\mu$ M  
363 concentration of sorafenib to maintain the acquired resistance.

364

### 365 **Quantitative real-time polymerase chain reaction (qRT-PCR)**

366 Total RNA was isolated from HCC cell lines using TRIzol reagent (Invitrogen,  
367 Rockville, MD, USA) according to the manufacturer's instructions. Purified  
368 RNA samples were reverse-transcribed into cDNA using the PrimeScript™ RT  
369 Reagent Kit with gDNA Eraser (RR047A, TaKaRa, Tokyo, Japan).  
370 Complementary DNA from cell samples was amplified with the specific primers  
371 (Supplementary Table. 1). Briefly, Real-time qPCR was performed to quantify  
372 mRNA levels, using the SYBR Green qPCR Master Mix (Bio-Rad, Hercules,  
373 CA, USA) in accordance with the manufacturer's instructions. The objective  
374 CT values were normalized to that of  $\beta$ -actin and relative mRNA expression

375 levels of genes were calculated using  $2^{-\Delta\Delta Ct}$  method. Each sample was  
376 analyzed in triplicate.

377

### 378 **Western blot analysis**

379 Protein samples from cells and animal tissues were lysed in Cell Lysis Buffer  
380 (Beyotime Biotechnology, Jiangsu, China) containing 1mM of  
381 phenylmethanesulfonyl fluoride (PMSF, Beyotime). The concentration of the  
382 protein homogenates was measured using the BCA protein assay Kit (Dingguo,  
383 Beijing, China). Equal volumes of protein samples were separated by  
384 SDS-poly acrylamide gel electrophoresis and electro-transferred to PVDF  
385 membranes (Millipore, Billerica, MA, USA). After blocked with 5% non-fat milk  
386 dissolved in TBST (10mM Tris, 150 mM NaCl, and 0.1% Tween-20; pH 7.6),  
387 for 2 h at room temperature, the membranes were incubated with the primary  
388 antibodies overnight at 4 °C. Thereafter, membranes were incubated with the  
389 secondary antibodies coupled to horseradish peroxidase (HRP) for 2 h at room  
390 temperature. Protein bands were visualized with enhanced  
391 Chemiluminescence substrate Kits (ECL, New Cell & Molecular Biotech Co,  
392 Ltd, China).

393

### 394 **Transmission electron microscope assay**

395 Cells were collected and fixed with 2.5% glutaraldehyde. Subsequently, cells  
396 were postfixed in 2% osmium tetroxide and dehydrated through a series of

397 graded ethyl alcohols. Samples were embedded in epoxy resin, sectioned, and  
398 placed onto nickel mesh grids. The images were acquired using a Hitachi-7500  
399 transmission electron microscope (Hitachi, Tokyo, Japan).

400

#### 401 **Intracellular ROS measurements**

402 Cells were seeded on coverslips in a 12-well plate, and then treated with the  
403 varying concentrations of test compound or drug. After 24 h, cells were  
404 incubated at a final concentration of 5  $\mu$ M CellROX® Orange reagent (Life  
405 Technologies, Carlsbad, USA) for 30 min at 37 °C, after which they were  
406 washed, dyed with DAPI, mounted with Anti-fade Mounting Medium, and  
407 immediately analyzed for fluorescence intensity under Leica Confocal  
408 Microscope (TCS SP8, Germany) with a 40 $\times$  objective lens.

409

#### 410 **Measurement of total iron contents in hepatoma cells and liver tissues**

411 The iron concentration was assessed using the Iron Assay Kit (MAK025;  
412 Sigma) according to the manufacturer's instructions. Briefly, tissues (10 mg) or  
413 cells ( $2 \times 10^6$ ) were rapidly homogenized in 4-10 volumes of Iron Assay buffer.  
414 Tissue or cell homogenates was centrifuged at 16,000  $\times g$  for 10 minutes at 4  
415 °C and removed insoluble material. To measure total iron, add 1-50  $\mu$ L  
416 samples to sample wells in a 96 well plate, bring the volume to 100  $\mu$ L per well  
417 with Iron Assay Buffer and add 5  $\mu$ L Iron Reducer to each of the sample wells  
418 to reduce Fe<sup>3+</sup> to Fe<sup>2+</sup>. And then samples were mixed using a horizontal

419 shaker and incubated at 25 °C for 30 minutes. Subsequently, 100 µL Iron  
420 Probe were added and incubated the reaction for 1 hr at 25 °C. During each  
421 incubation, the plate was protected from light. Thereafter, the absorbance was  
422 detected at 593 nm using a microplate reader.

423

#### 424 **Detection of malondialdehyde (MDA)**

425 Analysis of lipid peroxidation was assessed by quantification of MDA  
426 concentration in cell lysates using a Lipid Peroxidation MDA Assay Kit (S0131)  
427 obtained from Beyotime in accordance with the manufacturer's instructions.

428

#### 429 **Cell growth curve and cell viability assay**

430 For cell growth curve analysis, cells were seeded at  $1 \times 10^4$  cells/well in 96-well  
431 microtiter plates with three replicate per group and cultured overnight at 37°C  
432 in a humidified incubator containing 5% CO<sub>2</sub>. The plate was scanned and  
433 phase-contrast images were acquired after over a series of time points post  
434 treatment, and then quantified time-lapse curves were plotted using IncuCyte  
435 ZOOM software (Essen BioScience, Ann Arbor, MI, USA).

436 For cell viability assay, cells were seeded at 1,000 cells per well in 96-well  
437 plates with fresh medium and analysed by using the Cell Counting Kit-8  
438 (CCK-8) (CK04, Dojindo, Japan) according to the manufacturer's instructions.

439 The microplates were incubated at 37°C for additional 2 h. Absorbance was  
440 read at 450 nm using a microplate reader (Thermo Fisher, USA).

441

442 **Half maximal inhibitory concentration assay (IC50)**

443 The cells were planted in 96-well plates with fresh medium at  $1.0 \times 10^4$  cells per  
444 well. The corresponding concentrations of drug were given to cells for 24 h  
445 after the cultured plates were placed in a humidified incubator for 12 h. After 24  
446 h, CCK-8 (Dojindo, Japan) was used to measure drug sensitivity at 450 nm  
447 using a microplate reader (Thermo Fisher, USA) after incubating at 37 °C for  
448 1–2 h.

449

450 **Animal experiments**

451 Heterozygous 129-*Gstz1*<sup>tm1Jmfc</sup>/Cnbc mice (EM: 04481) were purchased from  
452 the European Mouse Mutant Archive and were crossed to breed wild-type (WT)  
453 and *Gstz1*<sup>-/-</sup> mice. All mice were maintained under individual ventilation cages  
454 conditions in the laboratory animal center of Chongqing Medical University. For  
455 subsequent studies, mice were divided into five groups as follows: WT+DMSO  
456 (control), WT+Sora, *Gstz1*<sup>-/-</sup>+DMSO, *Gstz1*<sup>-/-</sup>+Sora, and  
457 *Gstz1*<sup>-/-</sup>+Sora+RSL3. Each group included three male and three female mice.  
458 At 2 weeks of age, all mice were administered an intraperitoneal injection of  
459 diethylnitrosamine (DEN; Sigma, St. Louis, MO, USA) at a dose of 75 mg/kg.  
460 At the third week, the mice were intraperitoneally administered carbon  
461 tetrachloride (CCl<sub>4</sub>; Macklin, Shanghai, China) at 2 ml/kg twice a week for 12  
462 weeks. In the WT+Sora and *Gstz1*<sup>-/-</sup>+Sora group, the mice at 22 weeks were

463 administered intraperitoneally sorafenib (30mg/kg) every 2 days for 4 weeks  
464 until euthanasia. In the *Gstz1*<sup>-/-</sup>+Sora+RSL3 group, in addition to sorafenib  
465 administration as described above, the mice were injected intraperitoneally  
466 with RSL3 (10mg/kg) every 2 days for 4 weeks at the same weeks. Body  
467 weight of each mice was measured every week and retroorbital blood was  
468 collected before sacrifice. All mice were euthanized at 26 weeks of age. The  
469 liver weight and number of liver tumors were measured. Protein and mRNAs  
470 levels of hepatic tumors were detected by Western blotting and qRT-PCR  
471 analysis, respectively. The intrahepatic Iron and MDA levels were measured  
472 with Iron Assay Kit and MDA Assay Kit, respectively. Samples of liver tumor  
473 were collected for further study or fixed with 4% paraformaldehyde, embedded  
474 in paraffin, and sectioned for hematoxylin-eosin staining (H&E) and  
475 immunohistochemistry. All animal procedures were approved by the Research  
476 Ethics Committee of Chongqing Medical University (reference number:  
477 2017010).

478

#### 479 **Statistical analysis**

480 All experiments were repeated independently with similar results at least three  
481 times. Statistical analysis and data plotting were performed using GraphPad  
482 Prism 7 (GraphPad Software, USA). All data were presented as mean ±  
483 standard deviation (SD) values. Unless mentioned otherwise, comparisons  
484 between two groups were performed by Student's t-test, and Multiple-group

485 comparisons were performed by the one-way ANOVA analysis with Scheffe

486 post-hoc test.  $p < 0.05$  was considered statistically significant.

487



488

489 **References**

- 490 1 Bray F, Ferlay J, Soerjomataram I, Siegel RL, Torre LA, Jemal A. Global  
491 cancer statistics 2018: GLOBOCAN estimates of incidence and mortality  
492 worldwide for 36 cancers in 185 countries. *CA: A Cancer Journal for Clinicians*  
493 2018; **68**: 394–424.
- 494 2 Yang JD, Hainaut P, Gores GJ, Amadou A, Plymoth A, Roberts LR. A global  
495 view of hepatocellular carcinoma: trends, risk, prevention and management.  
496 *Nat Rev Gastroenterol Hepatol* 2019; **16**: 589–604.
- 497 3 Cheng A-L, Kang Y-K, Chen Z, Tsao C-J, Qin S, Kim JS *et al*. Efficacy and  
498 safety of sorafenib in patients in the Asia-Pacific region with advanced  
499 hepatocellular carcinoma: a phase III randomised, double-blind,  
500 placebo-controlled trial. *The Lancet Oncology* 2009; **10**: 25–34.
- 501 4 Raoul J-L, Kudo M, Finn RS, Edeline J, Reig M, Galle PR. Systemic  
502 therapy for intermediate and advanced hepatocellular carcinoma: Sorafenib  
503 and beyond. *Cancer Treatment Reviews* 2018; **68**: 16–24.
- 504 5 Dixon SJ, Lemberg KM, Lamprecht MR, Skouta R, Zaitsev EM, Gleason  
505 CE *et al*. Ferroptosis: An Iron-Dependent Form of Nonapoptotic Cell Death.  
506 *Cell* 2012; **149**: 1060–1072.
- 507 6 Stockwell BR, Friedmann Angeli JP, Bayir H, Bush AI, Conrad M, Dixon SJ  
508 *et al*. Ferroptosis: A Regulated Cell Death Nexus Linking Metabolism, Redox  
509 Biology, and Disease. *Cell* 2017; **171**: 273–285.

- 510 7 Forcina GC, Dixon SJ. GPX4 at the Crossroads of Lipid Homeostasis and  
511 Ferroptosis. *Proteomics* 2019; **19**: 1800311.
- 512 8 Lei P, Bai T, Sun Y. Mechanisms of Ferroptosis and Relations With  
513 Regulated Cell Death: A Review. *Front Physiol* 2019; **10**: 139.
- 514 9 Nie J, Lin B, Zhou M, Wu L, Zheng T. Role of ferroptosis in hepatocellular  
515 carcinoma. *J Cancer Res Clin Oncol* 2018; **144**: 2329–2337.
- 516 10 Lachaier E, Louandre C, Godin C, Saidak Z, Baert M, Diouf M *et al.*  
517 Sorafenib Induces Ferroptosis in Human Cancer Cell Lines Originating from  
518 Different Solid Tumors. *Anticancer Res* 2014; **34**: 6417-6422.
- 519 11 Louandre C, Ezzoukhry Z, Godin C, Barbare J-C, Mazière J-C, Chauffert B  
520 *et al.* Iron-dependent cell death of hepatocellular carcinoma cells exposed to  
521 sorafenib: Iron-dependent cytotoxicity of sorafenib. *Int J Cancer* 2013; **133**:  
522 1732–1742.
- 523 12 Townsend DM, Tew KD. The role of glutathione-S-transferase in  
524 anti-cancer drug resistance. *Oncogene* 2003; **22**: 7369–7375.
- 525 13 Zhang J, Ye Z, Chen W, Culpepper J, Jiang H, Ball LE *et al.* Altered redox  
526 regulation and S-glutathionylation of BiP contribute to bortezomib resistance in  
527 multiple myeloma. *Free Radical Biology and Medicine* 2020; **160**: 755–767.
- 528 14 Henderson CJ, McLaren AW, Wolf CR. In Vivo Regulation of Human  
529 Glutathione Transferase GSTP by Chemopreventive Agents. *Cancer Res.*  
530 2014; **74**: 4378-4387.
- 531 15 Wang X, Huang ZH. Predictive potential role of glutathione S-transferase

- 532 polymorphisms in the prognosis of breast cancer. *Genet Mol Res* 2015; **14**:  
533 10236–10241.
- 534 16 Tew KD. Glutathione-Associated Enzymes In Anticancer Drug Resistance.  
535 *Cancer Research* 2016; **76**: 7–9.
- 536 17 Rocha G da G, Oliveira RR, Kaplan MAC, Gattass CR. 3 $\beta$ -Acetyl tormentic  
537 acid reverts MRP1/ABCC1 mediated cancer resistance through modulation of  
538 intracellular levels of GSH and inhibition of GST activity. *European Journal of*  
539 *Pharmacology* 2014; **741**: 140–149.
- 540 18 Fernández-Cañón JM, Peñalva MA. Characterization of a Fungal  
541 Maleylacetoacetate Isomerase Gene and Identification of Its Human  
542 Homologue. *J Biol Chem* 1998; **273**: 329–337.
- 543 19 Yang F, Li J, Deng H, Wang Y, Lei C, Wang Q *et al.* GSTZ1-1 Deficiency  
544 Activates NRF2/IGF1R Axis in HCC via Accumulation of Oncometabolite  
545 Succinylacetone. *EMBO J* 2019; **38**. doi:10.15252/embj.2019101964.
- 546 20 Li J, Wang Q, Yang Y, Lei C, Yang F, Liang L *et al.* GSTZ1 deficiency  
547 promotes hepatocellular carcinoma proliferation via activation of the  
548 KEAP1/NRF2 pathway. *J Exp Clin Cancer Res* 2019; **38**: 438.
- 549 21 van Malenstein H, Dekervel J, Verslype C, Van Cutsem E, Windmolders P,  
550 Nevens F *et al.* Long-term exposure to sorafenib of liver cancer cells induces  
551 resistance with epithelial-to-mesenchymal transition, increased invasion and  
552 risk of rebound growth. *Cancer Letters* 2013; **329**: 74–83.
- 553 22 Ye Z, Hu Q, Zhuo Q, Zhu Y, Fan G, Liu M *et al.* Abrogation of ARF6

- 554 promotes RSL3-induced ferroptosis and mitigates gemcitabine resistance in  
555 pancreatic cancer cells. *Am J Cancer Res.* 2020; **10**: 1182-1193.
- 556 23 Li Y, Yan H, Xu X, Liu H, Wu C, Zhao L. Erastin/sorafenib induces cisplatin  
557 -resistant non-small cell lung cancer cell ferroptosis through inhibition of the  
558 Nrf2/xCT pathway. *Oncol Lett.* 2020; **19**: 323-333.
- 559 24 Sun X, Niu X, Chen R, He W, Chen D, Kang R *et al.* Metallothionein-1G  
560 facilitates sorafenib resistance through inhibition of ferroptosis. *Hepatology*  
561 2016; **64**: 488–500.
- 562 25 Dixon SJ, Patel DN, Welsch M, Skouta R, Lee ED, Hayano M *et al.*  
563 Pharmacological inhibition of cystine–glutamate exchange induces  
564 endoplasmic reticulum stress and ferroptosis. *eLife* 2014; **3**: e02523.
- 565 26 Sun X, Ou Z, Chen R, Niu X, Chen D, Kang R *et al.* Activation of the  
566 p62-Keap1-NRF2 pathway protects against ferroptosis in hepatocellular  
567 carcinoma cells: Hepatobiliary Malignancies. *Hepatology* 2016; **63**: 173–184.
- 568 27 Li D, Li Y. The interaction between ferroptosis and lipid metabolism in  
569 cancer. *Sig Transduct Target Ther* 2020; **5**: 108.
- 570 28 Kobayashi A, Kang M-I, Okawa H, Ohtsuji M, Zenke Y, Chiba T *et al.*  
571 Oxidative Stress Sensor Keap1 Functions as an Adaptor for Cul3-Based E3  
572 Ligase To Regulate Proteasomal Degradation of Nrf2. *MCB* 2004; **24**:  
573 7130–7139.
- 574 29 Dai C, Chen X, Li J, Comish P, Kang R, Tang D. Transcription factors in  
575 ferroptotic cell death. *Cancer Gene Ther* 2020; **27**: 645–656.

- 576 30 Dodson M, Castro-Portuguez R, Zhang DD. NRF2 plays a critical role in  
577 mitigating lipid peroxidation and ferroptosis. *Redox Biology* 2019; **23**: 101107.
- 578 31 Venook AP, Papandreou C, Furuse J, Ladrón de Guevara L. The Incidence  
579 and Epidemiology of Hepatocellular Carcinoma: A Global and Regional  
580 Perspective. *The Oncologist* 2010; **15**: 5–13.
- 581 32 Llovet JM, Montal R, Sia D, Finn RS. Molecular therapies and precision  
582 medicine for hepatocellular carcinoma. *Nat Rev Clin Oncol* 2018; **15**: 599–616.
- 583 33 Townsend DM, Tew KD. The role of glutathione-S-transferase in  
584 anti-cancer drug resistance. *Oncogene* 2003; **22**: 7369–7375.
- 585 34 Tew KD. Glutathione-Associated Enzymes In Anticancer Drug Resistance.  
586 *Cancer Research* 2016; **76**: 7–9.
- 587 35 Pereira D, Assis J, Gomes M, Nogueira A, Medeiros R. Improvement of a  
588 predictive model in ovarian cancer patients submitted to platinum-based  
589 chemotherapy: implications of a GST activity profile. *Eur J Clin Pharmacol*  
590 2016; **72**: 545–553.
- 591 36 Sawers L, Ferguson MJ, Ihrig BR, Young HC, Chakravarty P, Wolf CR *et al.*  
592 Glutathione S-transferase P1 (GSTP1) directly influences platinum drug  
593 chemosensitivity in ovarian tumour cell lines. *Br J Cancer* 2014; **111**:  
594 1150–1158.
- 595 37 Singh RR, Mohammad J, Orr M, Reindl KM. Glutathione S-Transferase  
596 pi-1 Knockdown Reduces Pancreatic Ductal Adenocarcinoma Growth by  
597 Activating Oxidative Stress Response Pathways. *Cancers (Basel)* 2020; **12**:

- 598 1501.
- 599 38 Tong X, Zhao J, Zhang Y, Mu P, Wang X. Expression levels of MRP1,  
600 GST- $\pi$ , and GSK3 $\beta$  in ovarian cancer and the relationship with drug resistance  
601 and prognosis of patients. *Oncol Lett.* 2019; **18**: 22-28.
- 602 39 Wang Q. Expression of P-gp, MRP, LRP, GST- $\pi$  and TopoII $\alpha$  and intrinsic  
603 resistance in human lung cancer cell lines. *Oncol Rep.* 2011; **26**: 1081-1089.
- 604 40 Zou M, Hu X, Xu B, Tong T, Jing Y, Xi L *et al.* Glutathione S-transferase  
605 isozyme alpha 1 is predominantly involved in the cisplatin resistance of  
606 common types of solid cancer. *Oncol Rep* 2019; **41**: 989–998.
- 607 41 Manz DH, Blanchette NL, Paul BT, Torti FM, Torti SV. Iron and cancer:  
608 recent insights: Iron and cancer. *Ann NY Acad Sci* 2016; **1368**: 149–161.
- 609 42 Torti SV, Torti FM. Iron and cancer: more ore to be mined. *Nat Rev Cancer*  
610 2013; **13**: 342–355.
- 611 43 Hassannia B, Vandenabeele P, Vanden Berghe T. Targeting Ferroptosis to  
612 Iron Out Cancer. *Cancer Cell* 2019; **35**: 830–849.
- 613 44 Friedmann Angeli JP, Krysko DV, Conrad M. Ferroptosis at the crossroads  
614 of cancer-acquired drug resistance and immune evasion. *Nat Rev Cancer*  
615 2019; **19**: 405–414.
- 616 45 Yu Y, Xie Y, Cao L, Yang L, Yang M, Lotze MT *et al.* The ferroptosis inducer  
617 erastin enhances sensitivity of acute myeloid leukemia cells to  
618 chemotherapeutic agents. *Molecular & Cellular Oncology* 2015; **2**: e1054549.
- 619 46 Sato M, Kusumi R, Hamashima S, Kobayashi S, Sasaki S, Komiyama Y, *et*

620 *al.* The ferroptosis inducer erastin irreversibly inhibits system xc- and  
621 synergizes with cisplatin to increase cisplatin's cytotoxicity in cancer cells. *Sci*  
622 *Rep.* 2018; **8**: 968.

623 47 Bai T, Wang S, Zhao Y, Zhu R, Wang W, Sun Y. Haloperidol, a sigma  
624 receptor 1 antagonist, promotes ferroptosis in hepatocellular carcinoma cells.  
625 *Biochem Biophys Res Commun.* 2017; **491**: 919-925.

626 48 Shimada K, Skouta R, Kaplan A, Yang WS, Hayano M, Dixon SJ *et al.*  
627 Global survey of cell death mechanisms reveals metabolic regulation of  
628 ferroptosis. *Nat Chem Biol* 2016; **12**: 497–503.

629 49 Shimada K, Hayano M, Pagano NC, Stockwell BR. Cell-Line Selectivity  
630 Improves the Predictive Power of Pharmacogenomic Analyses and Helps  
631 Identify NADPH as Biomarker for Ferroptosis Sensitivity. *Cell Chemical*  
632 *Biology* 2016; **23**: 225–235.

633 50 Bogdan AR, Miyazawa M, Hashimoto K, Tsuji Y. Regulators of Iron  
634 Homeostasis: New Players in Metabolism, Cell Death, and Disease. *Trends in*  
635 *Biochemical Sciences* 2016; **41**: 274–286.

636 51 Anandhan A, Dodson M, Schmidlin CJ, Liu P, Zhang DD. Breakdown of an  
637 Ironclad Defense System: The Critical Role of NRF2 in Mediating Ferroptosis.  
638 *Cell Chemical Biology* 2020; **27**: 436–447.

639  
640

641 **Acknowledgements**

642 We wish to thank Dr. T.-C He (University of Chicago, USA) for providing the  
643 plasmids pAdEasy system, and Prof. Ding Xue (Tsinghua University) for  
644 supplying the CRISPR/Cas9 system.

645

646 **Conflict of interest**

647 The authors declare that they have no conflict of interest.

648

649 **Authors' contributions**

650 ALH, NT and KW conceived the study and designed the experiments. QJW,  
651 BC and QX performed most experiments and analyzed the data. QZG assisted  
652 with experiments in *Gstz1*<sup>-/-</sup> knockout mice. QJW, NT and KW drafted and  
653 edited the manuscript with all authors providing feedback.

654

655 **Ethics Statement**

656 This study was approved by the Research Ethics Committee of Chongqing  
657 Medical University (reference number: 2017010).

658

659 **Funding**

660 This work was supported by the China National Natural Science Foundation  
661 (grant no. 81872270, 82072286, 82073251), the Natural Science Foundation  
662 Project of Chongqing (cstc2018jcyjAX0254, cstc2019jcyj-msxmX0587), the



663 Major National S&T program (2017ZX10202203-004), the Scientific Research  
664 Innovation Project for Postgraduate in Chongqing (grant no. CYS19192), and  
665 the Science and Technology Research Program of Chongqing Municipal  
666 Education Commission (KJZD-M202000401, KJQN201900429).

667

668 **Data Availability**

669 The datasets used and/or analyzed during the current study are available from  
670 the corresponding author on reasonable request.

671

672 **Figures and figure legends**

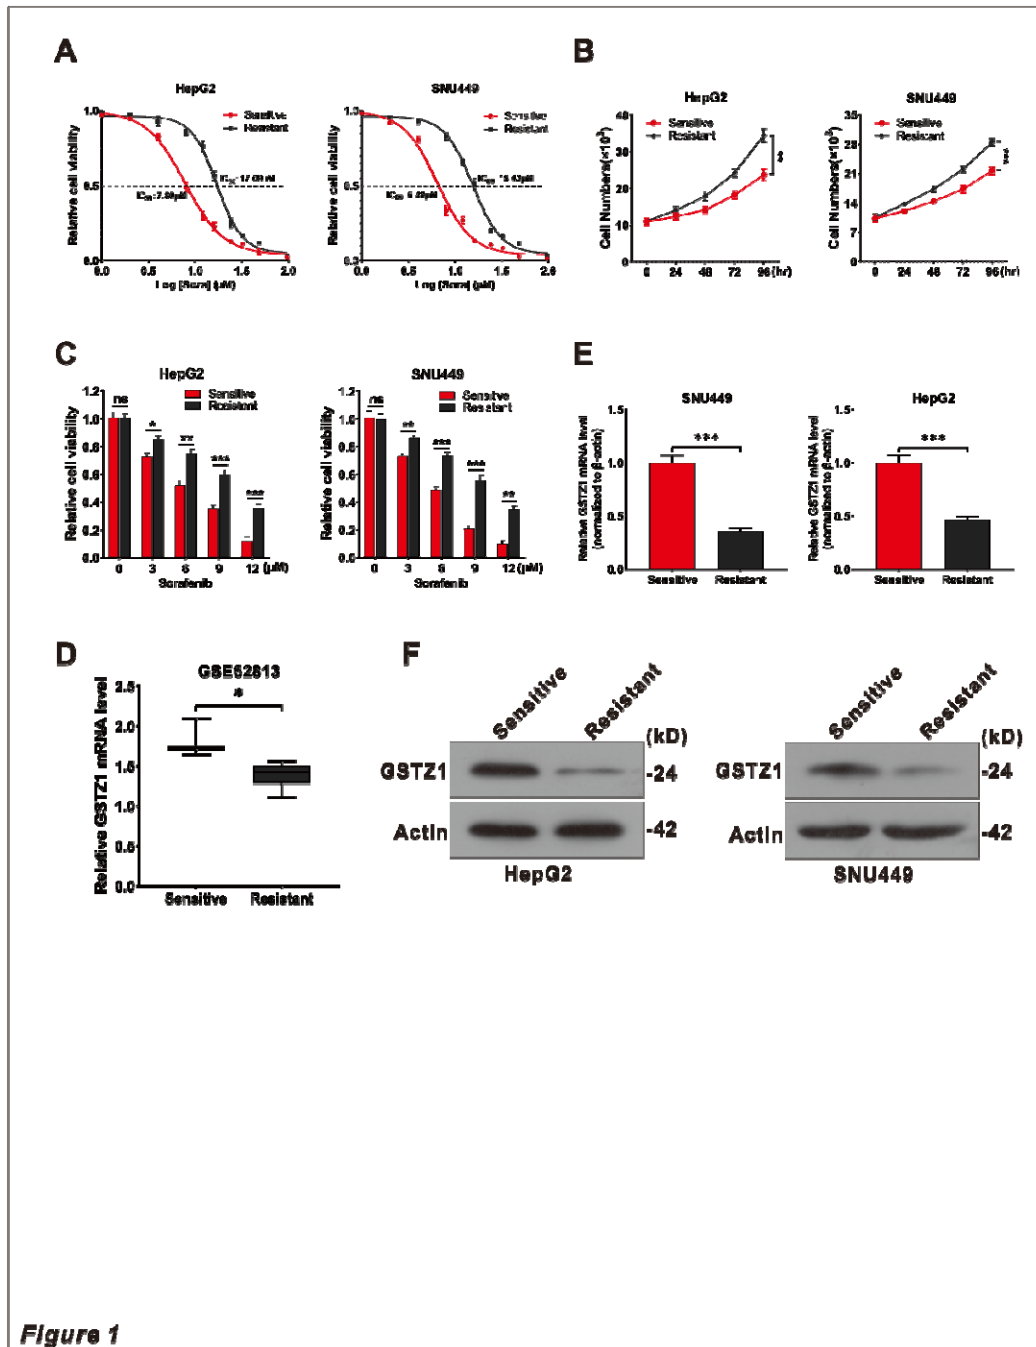

673

674 **Fig. 1** GSTZ1 is downregulated in sorafenib-resistant HCC cells. **a** The IC<sub>50</sub>  
 675 values of sorafenib-sensitive and sorafenib-resistant HCC cells treated with  
 676 sorafenib. **b** Cell growth curve. **c** These sorafenib-sensitive and

677 sorafenib-resistant HCCs (HepG2, SNU449) were treated with indicated  
678 concentrations of sorafenib for 24 h, and cell viability was assayed using the  
679 CCK-8 assay. **d** GSTZ1 RNA level in sorafenib-sensitive HepG2 cells (n=3)  
680 and sorafenib-resistant HepG2 cells (n=10). **e-f** mRNA and protein levels of  
681 GSTZ1 in sorafenib-sensitive and sorafenib-resistant cells. For Western  
682 blotting, 50 µg protein was loaded per well. HCC: hepatocellular carcinoma.  
683 Values represent the mean ± standard deviation (SD) (n = 3, performed in  
684 triplicate). ns: no significant difference, \*p < 0.05, \*\*p < 0.01, \*\*\*p < 0.001,  
685 Student's *t*-test (two groups) or one-way ANOVA followed by Tukey tests (three  
686 groups).  
687

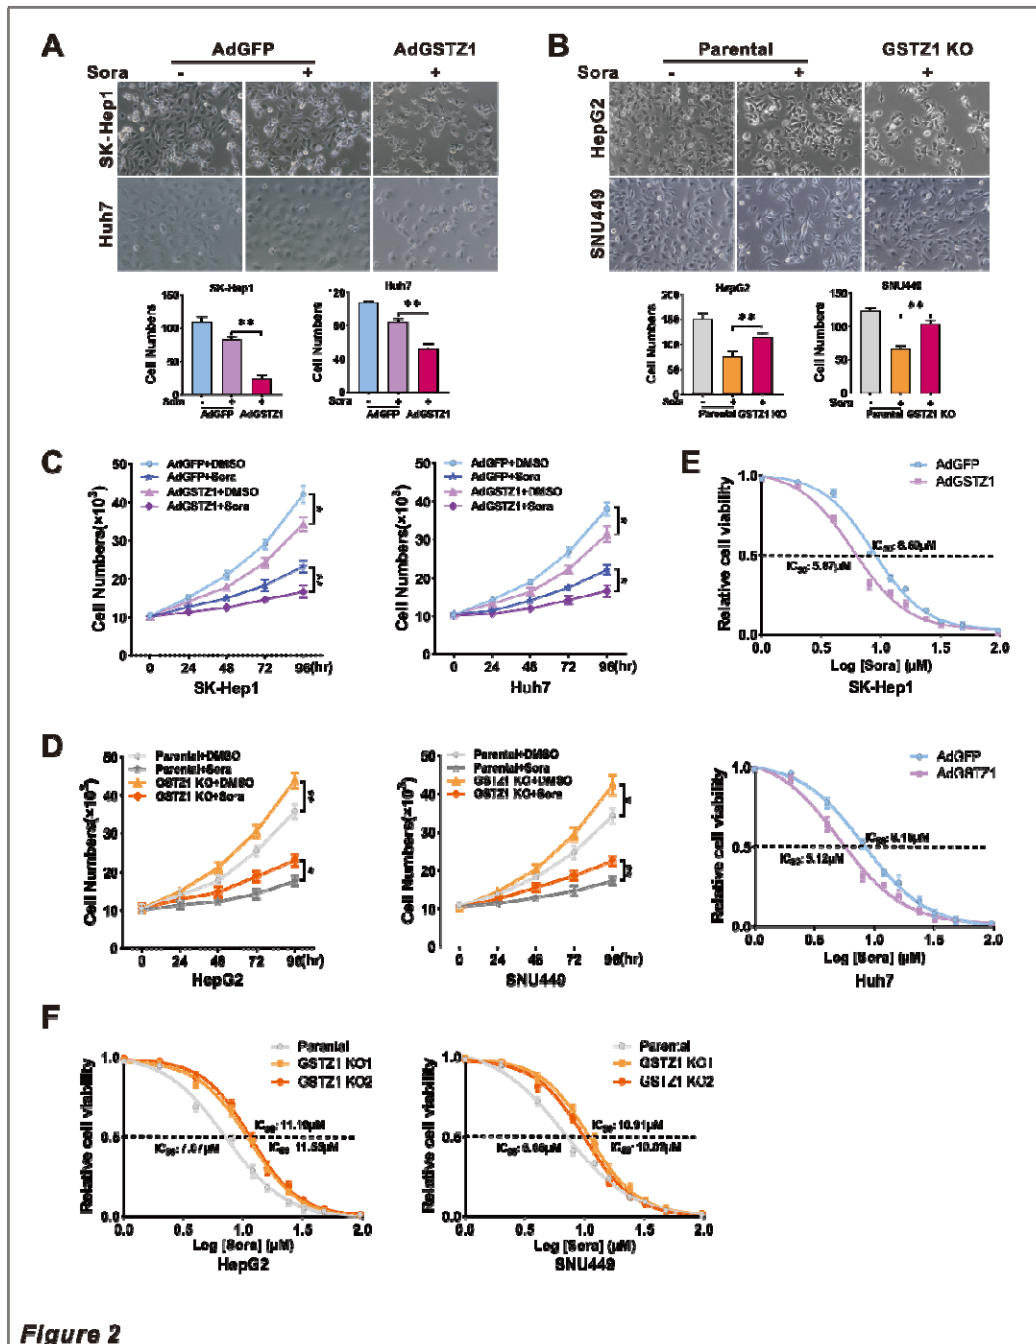

688

**Figure 2**

689

**Fig. 2** GSTZ1 knockout promotes sorafenib resistance in HCC cells. **a-b**

690

Morphological phase-contrast images (top) and quantification (bottom) of cells

691

after treatment with or without sorafenib (10  $\mu$ M) for 24 h. Magnifications:  $\times 200$ .

692

**c-d** Cell growth curve. GSTZ1 overexpression (OE) (**c**) and GSTZ1 knockout

693 (KO) (**d**) cells were treated with or without sorafenib (10  $\mu$ M). **e-f** The IC50 of  
694 GSTZ1-OE (**g**) and GSTZ1-KO (**h**) cells were determined using the CCK-8  
695 assay. HCC: hepatocellular carcinoma, DMSO: dimethyl sulphoxide, Sora:  
696 sorafenib. Values represent the mean  $\pm$  SD (n = 3, performed in triplicate). \*p <  
697 0.05, \*\*p < 0.01, Student's t-test (two groups) or one-way ANOVA followed by  
698 Tukey tests (three groups).  
699  
700

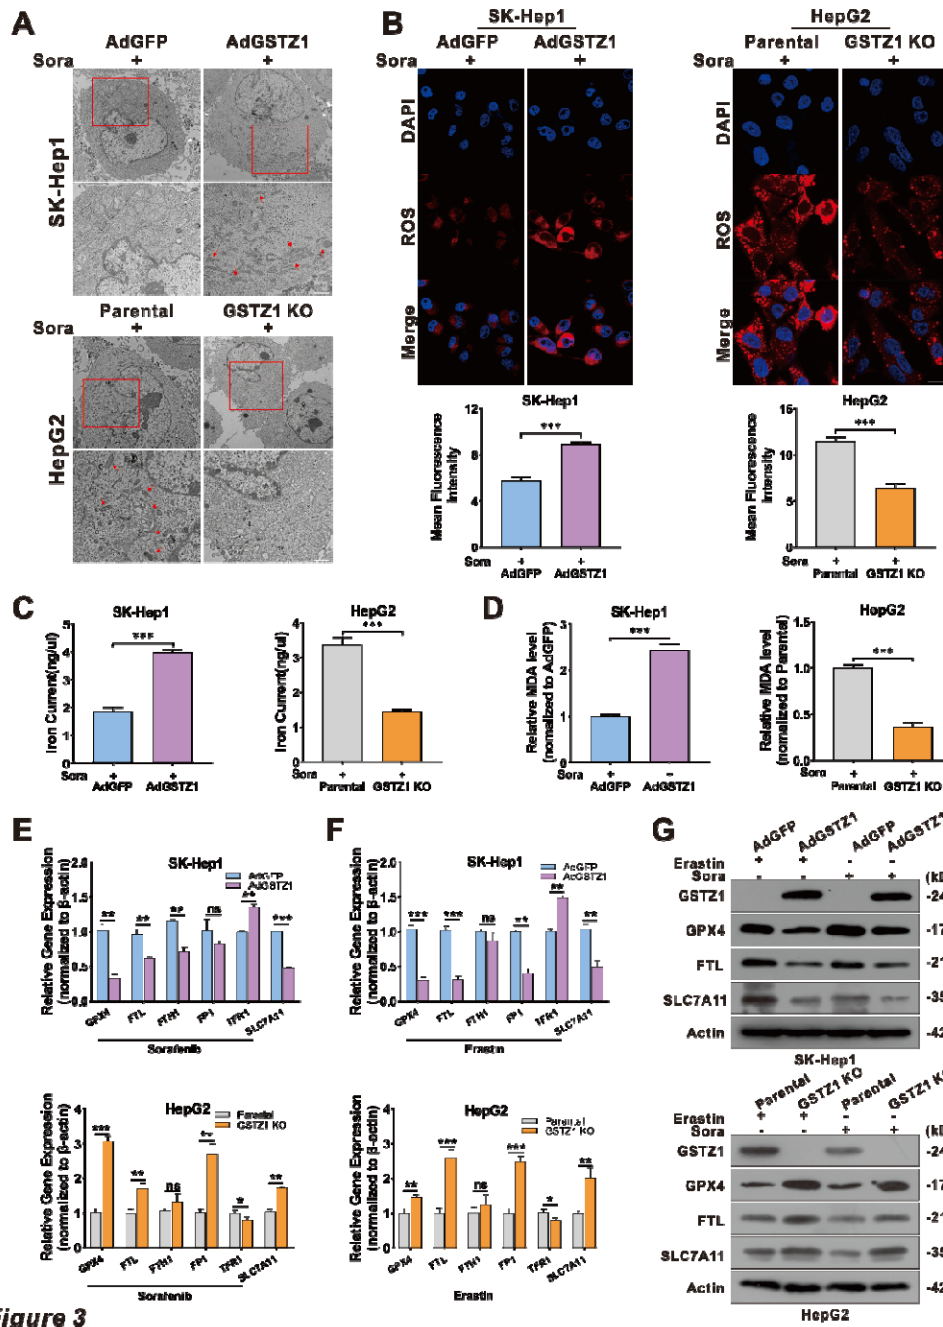

701

**Figure 3**

702

**Fig. 3** GSTZ1 overexpression enhances SK-Hep1 sorafenib-induced ferroptosis in HCC.

703

**a** Representative TEM images of the mitochondrial morphology in GSTZ1-OE

704

SK-Hep1 and GSTZ1-KO HepG2 cells treated with 10  $\mu$ M sorafenib for 24 h.

705

Red arrows indicate mitochondria. Bar = 1  $\mu$ m. **b** Representative images (top

706 and quantification (bottom) of ROS level in GSTZ1-OE and GSTZ1-KO cells  
707 treated with sorafenib for 24 h. Bar = 20  $\mu$ m. **c-d** The intracellular iron (**c**) and  
708 MDA (**d**) levels in GSTZ1-OE and GSTZ1-KO cells treated with sorafenib for  
709 24 h. **e-g** mRNA and protein levels of target genes associated with ferroptosis  
710 in GSTZ1-OE and GSTZ1-KO cells treated with sorafenib or erastin,  
711 determined via qRT-PCR (**e-f**) and Western blotting (**g**), respectively. For  
712 Western blotting, 50  $\mu$ g protein was loaded per well. HCC: hepatocellular  
713 carcinoma, Sora: sorafenib, ROS: reactive oxygen species, MDA:  
714 malondialdehyde. Values represent the mean  $\pm$  SD (n = 3, performed in  
715 triplicate). ns: no significant difference, \*p < 0.05, \*\*p < 0.01, \*\*\*p < 0.001,  
716 Student's *t*-test (two groups) or one-way ANOVA followed by Tukey tests (three  
717 groups).  
718  
719

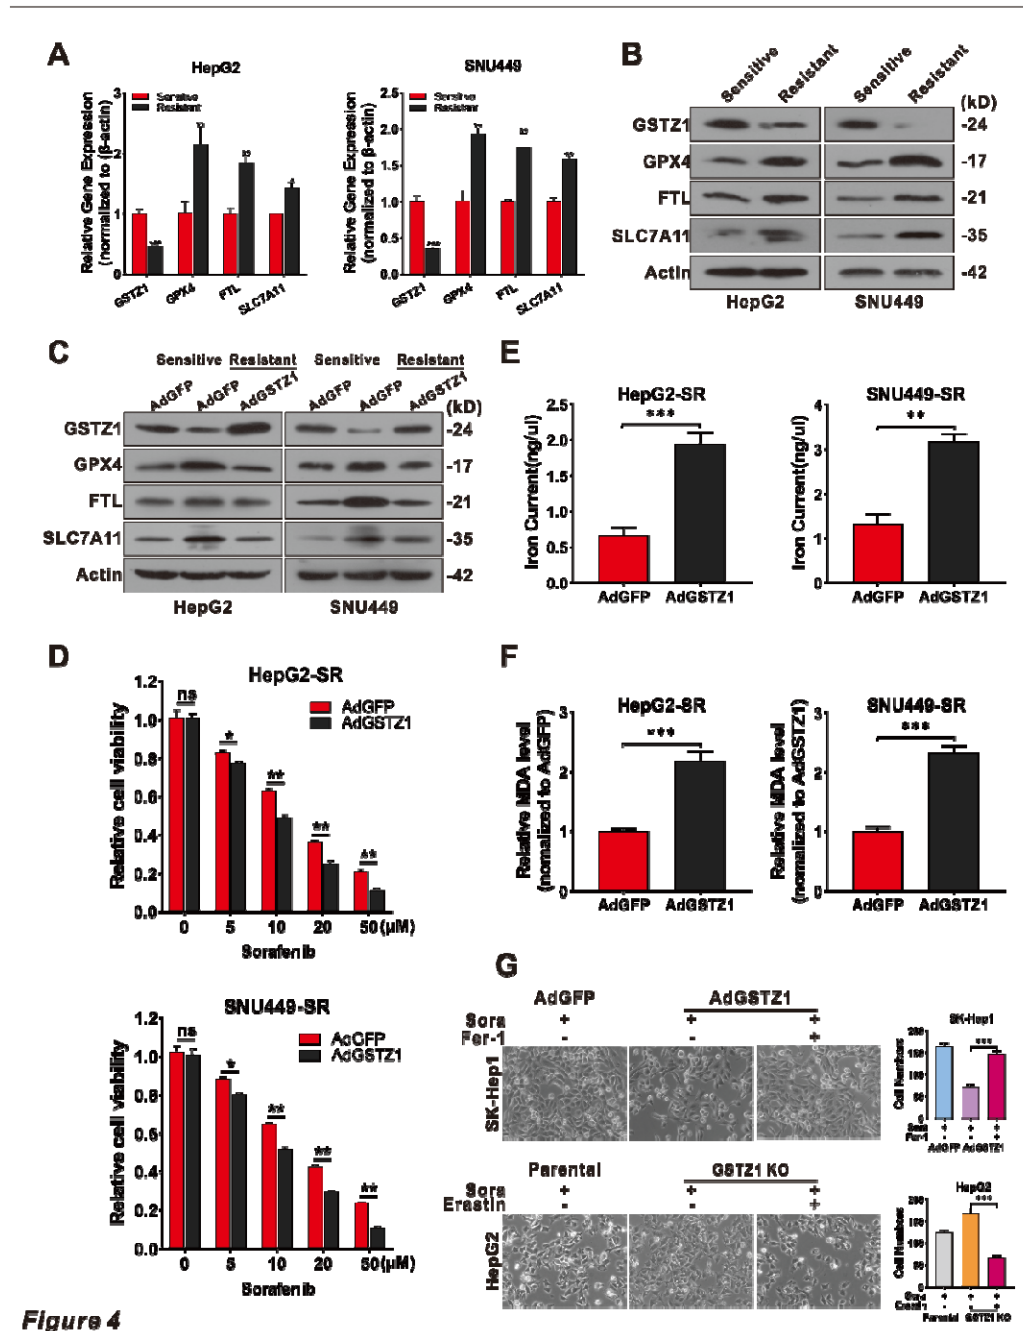

720

**Figure 4**

721

**Fig. 4** GSTZ1 overexpression sensitizes hepatoma cells to sorafenib-induced

722

ferroptosis. **a-b** The mRNA (**a**) and protein (**b**) levels of ferroptosis-related

723

genes in sorafenib-sensitive and sorafenib-resistant cells were assayed using

724

qRT-PCR and Western blotting, respectively. **c** Western blotting for



725 assessment of protein levels of ferroptosis-related genes in sorafenib-resistant  
726 HCCs with adenoviruses expressing GFP (AdGFP) or GSTZ1 (AdGSTZ1). **d**  
727 The cell viability of sorafenib-resistant cell with GSTZ1 overexpression was  
728 determined using CCK-8 assay. **e-f** The iron (**e**) and MDA (**f**) levels in  
729 GSTZ1-OE sorafenib-resistant cells. **g** The morphology (left) and  
730 quantification (right) of indicated HCC cells treated with sorafenib (10  $\mu$ M for  
731 24 h) alone or in combination with Fer-1 (1  $\mu$ M for 24 h) or erastin (10  $\mu$ M for  
732 24 h). Magnifications:  $\times$ 200. For Western blotting, 50  $\mu$ g protein was loaded  
733 per well. HCC: hepatocellular carcinoma, Sora: sorafenib, MDA:  
734 malondialdehyde, Fer-1: ferrostatin-1, SR: sorafenib resistant. Values  
735 represent the mean  $\pm$  SD (n = 3, performed in triplicate). ns: no significant  
736 difference, \*p < 0.05, \*\*p < 0.01, \*\*\*p < 0.001, Student's t-test (two groups) or  
737 one-way ANOVA followed by Tukey tests (three groups).  
738  
739

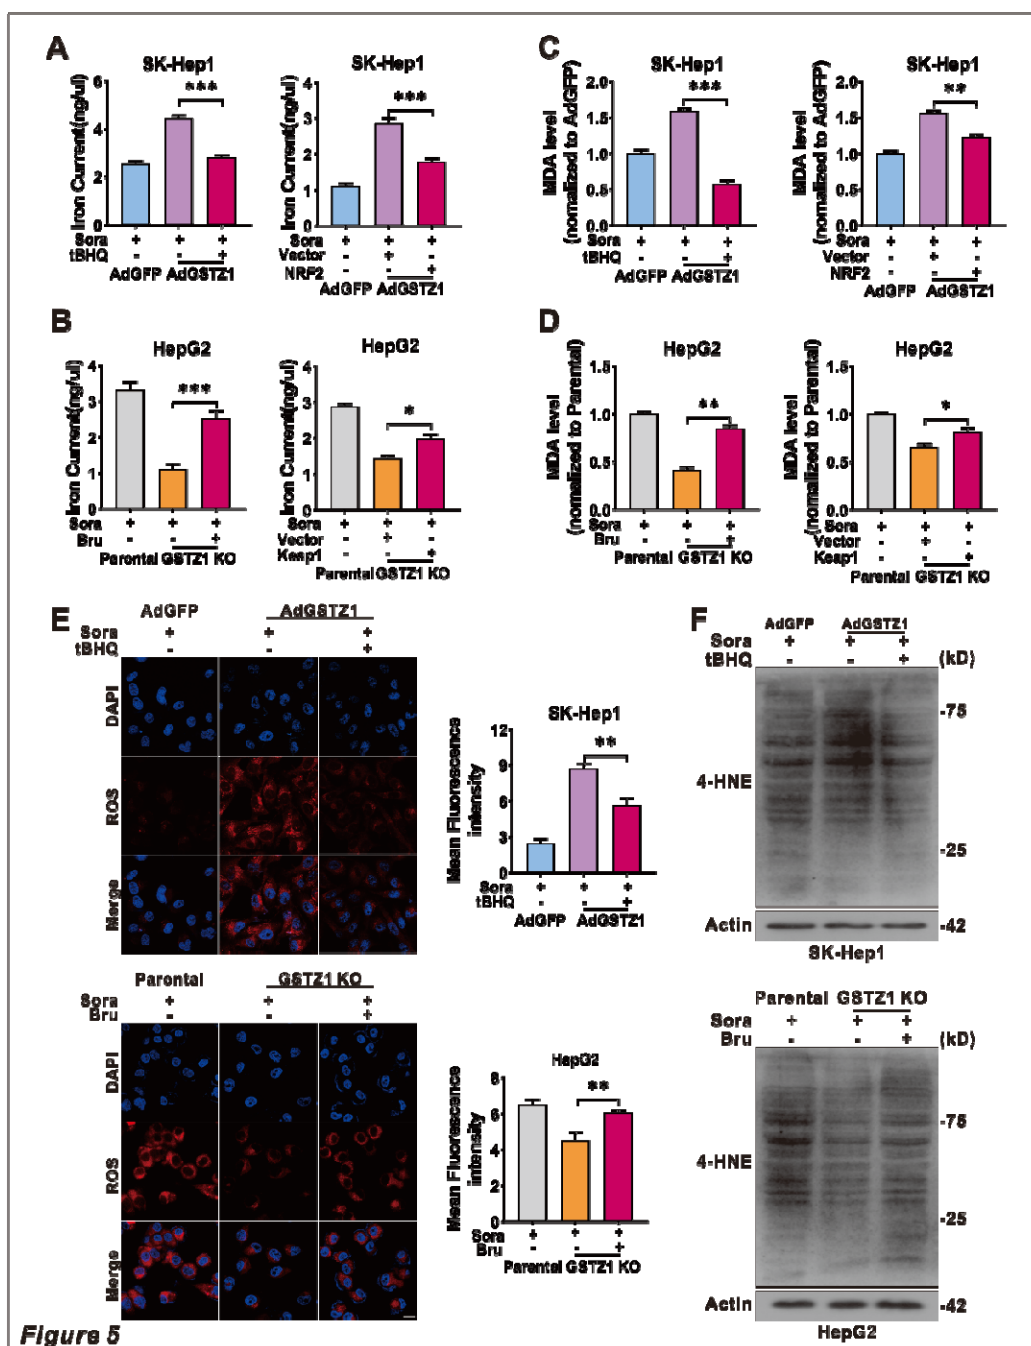

740

**Figure 5**

741

**Fig. 5** GSTZ1 knockout cells are insensitive to sorafenib-induced ferroptosis

742

through the activation of NRF2. a GSTZ1-OE cells were treated with sorafenib

743

alone or in combination with tBHQ (100  $\mu$ M for 3 h) (left). GSTZ1-KO cells

744

were treated with sorafenib alone or in combination with Bru (40 nM for 24 h)

745 (left). Expressing Flag-KEAP1 plasmid was transfected into GSTZ1-OE cells  
746 with sorafenib treatment (right). Expressing Myc-NRF2 plasmid was  
747 transfected into GSTZ1-KO cells with sorafenib treatment (right). Levels of iron  
748 (**a-b**), and MDA (**c-d**) in these cells were assayed. **e** Representative images  
749 (top) and quantification (bottom) of ROS level in GSTZ1-OE cells treated with  
750 sorafenib alone or in combination with tBHQ (top) and GSTZ1-KO cells treated  
751 with sorafenib alone or in combination with Bru (bottom). Bar = 20  $\mu$ m. **f**  
752 4-HNE-induced protein modification were examined. The cell processing is  
753 described as above. For Western blotting, 50  $\mu$ g protein was loaded per well.  
754 tBHQ: tertiary butylhydroquinone, Bru: brusatol, Sora: sorafenib, MDA:  
755 malondialdehyde, 4-HNE: 4-hydroxy-2-nonenal. Values represent the mean  $\pm$   
756 SD (n = 3, performed in triplicate). ns: no significant difference, \*p < 0.05, \*\*p <  
757 0.01, \*\*\*p < 0.001, Student's t-test (two groups) or one-way ANOVA followed  
758 by Tukey tests (three groups).

759

760

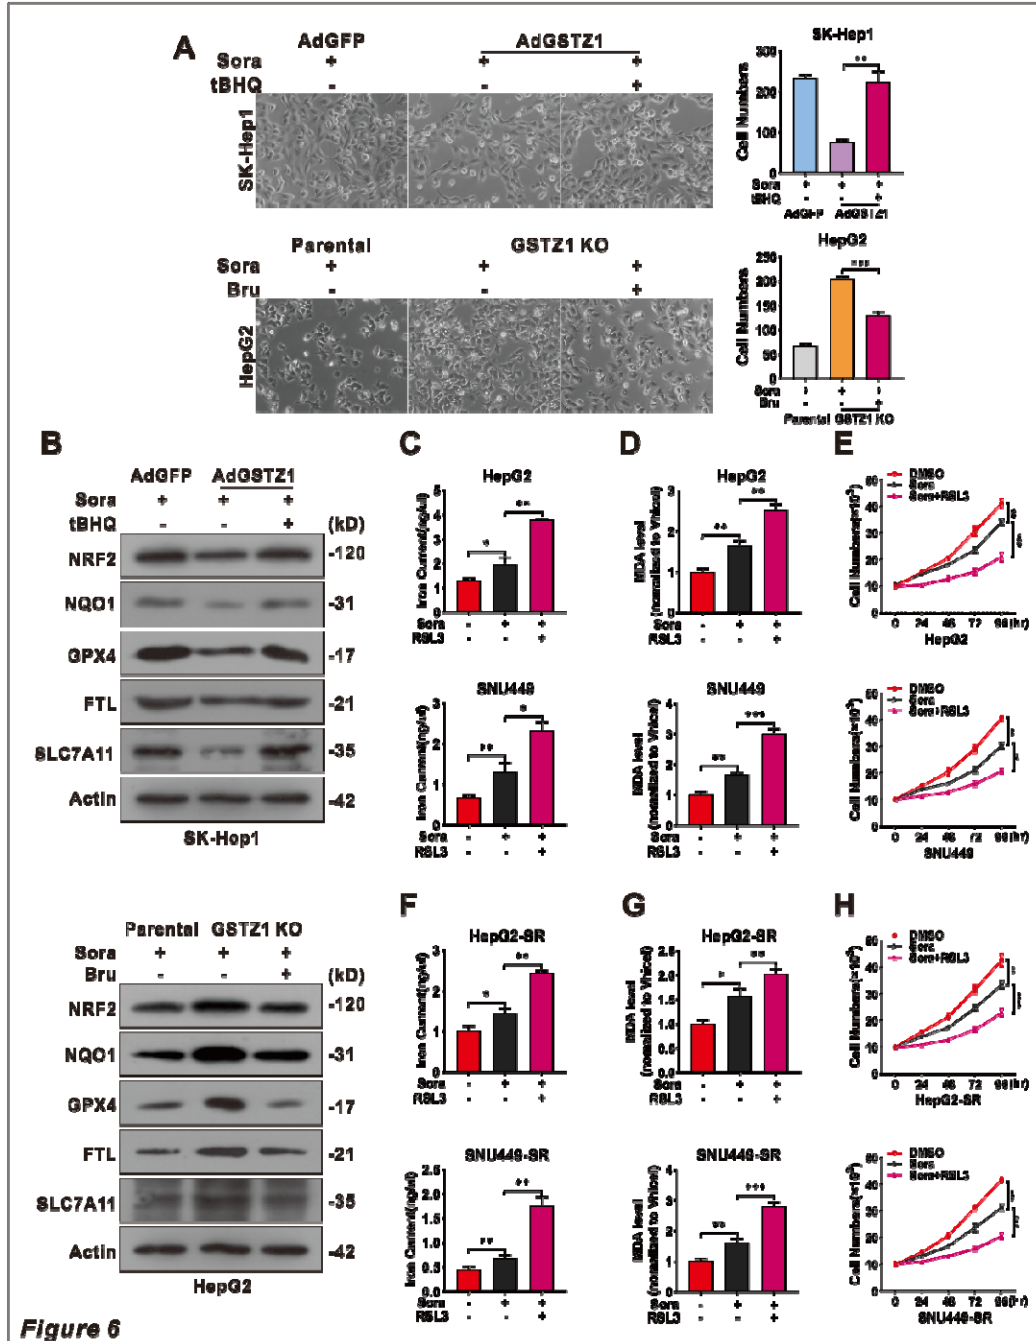

761

**Figure 6**

762

**Fig. 6** RSL3 enhances the sensitivity of GSTZ1-KO and sorafenib-resistant

763

cells to sorafenib. **a-b** Morphological changes (a) and protein level (b) of

764

ferroptosis-related genes in GSTZ1-OE SK-Hep1 cells treated with sorafenib

765

alone or in combination with tBHQ (top) and GSTZ1-KO HepG2 cells treated

766 with sorafenib alone or in combination with Bru (bottom). Magnifications:  $\times 200$ .

767 **c-d** The iron (left) and MDA (right) levels in GSTZ1-KO cells treated with

768 sorafenib alone or in combination with RSL3 (500nM for 24 h). **e** The cell

769 growth curve of GSTZ1-KO cells treated with sorafenib alone or in combination

770 with RSL3. **f-g** The iron (left) and MDA (right) levels in sorafenib-resistant cells

771 treated with sorafenib alone or in combination with RSL3. **h** The cell growth

772 curve of sorafenib-resistant cells treated with sorafenib alone or in combination

773 with RSL3. For Western blotting, 50  $\mu$ g protein was loaded per well. RSL3:

774 Ras-selective lethal small molecule 3, tBHQ: tertiary butylhydroquinone, Bru:

775 brusatol, DMSO: dimethyl sulphoxide, Sora: sorafenib, MDA: malondialdehyde.

776 Values represent the mean  $\pm$  SD (n = 3, performed in triplicate). \*p < 0.05, \*\*p

777 < 0.01, \*\*\*p < 0.001, Student's t-test (two groups) or one-way ANOVA followed

778 by Tukey tests (three groups).

779

780

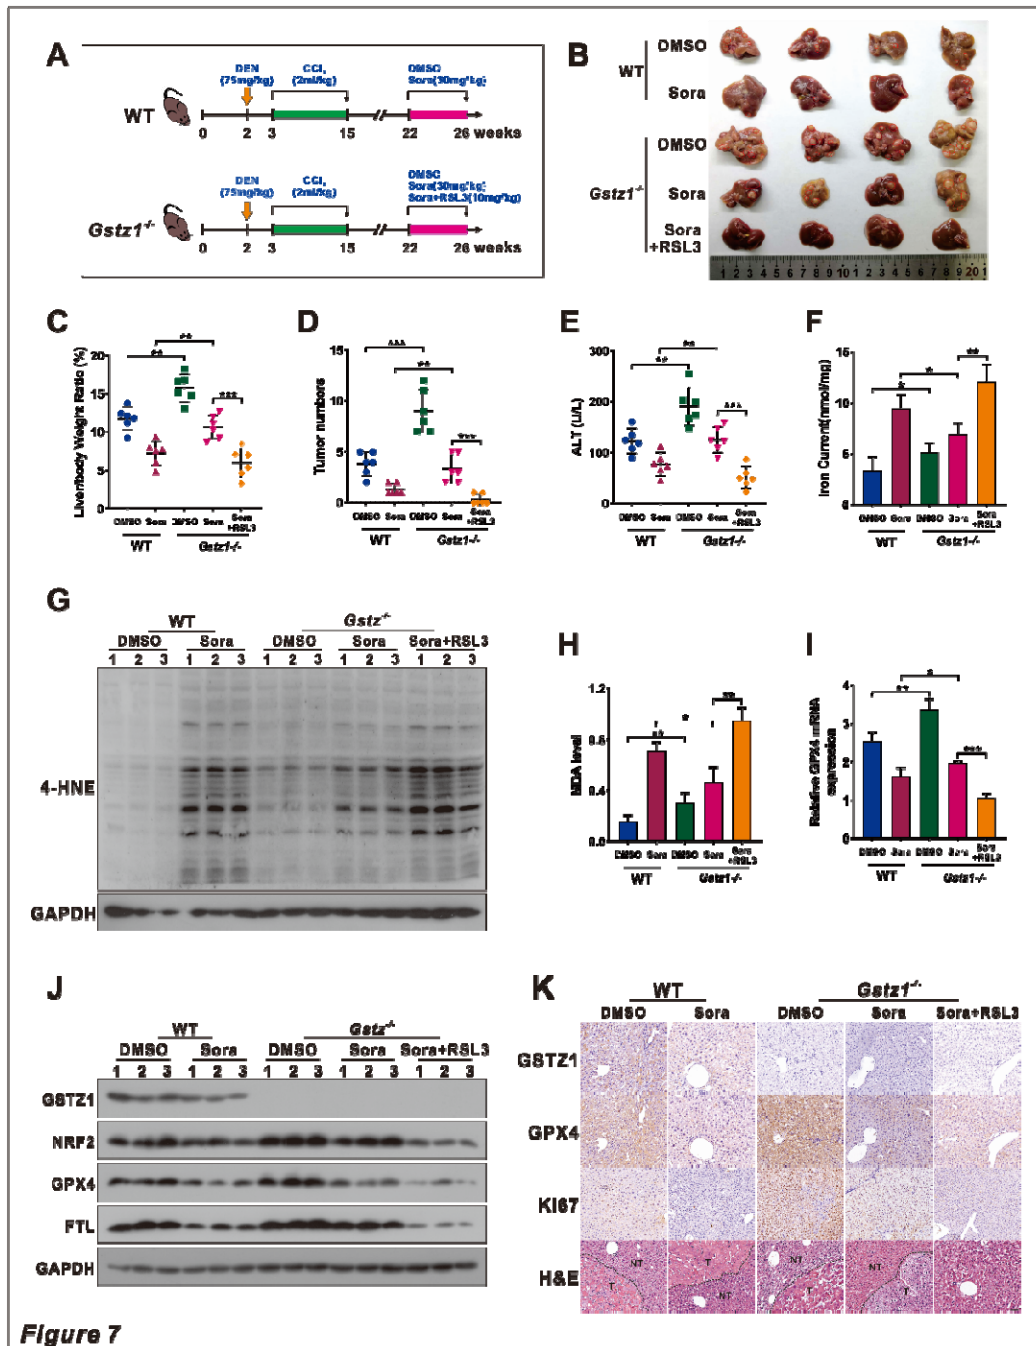

781

**Figure 7**

782 **Fig. 7** RSL3 enhances the anticancer activity of sorafenib in *Gstz1*<sup>-/-</sup> mice. **a**

783 Schematic representation of the experimental design for mice. **b** Gross

784 appearances of liver tumors. The red circles represent tumors. **c-e** In vivo

785 analyses of liver/body weight ratio (**c**), tumor numbers (**d**), and serum alanine

786 aminotransferase (ALT) (**e**) levels of the five groups. **f-h** The levels of iron (**f**)  
787 and MDA (**h**) in mice were assayed. Western blotting to assess 4-HNE  
788 modification level (**g**) in murine livers. **i-j** mRNA (**i**) and protein (**j**) levels of  
789 GPX4, FTL, and SLC7A11 in the five groups of liver tumors as assessed using  
790 Western blotting and real-time qPCR, respectively. **k** Representative H&E  
791 staining and immunohistochemistry images of GSTZ1, GPX4, and Ki67 in  
792 hepatic tumors. Bar = 50  $\mu\text{m}$ . For Western blotting, 50  $\mu\text{g}$  protein was loaded  
793 per well. WT: wild type, DEN: diethylnitrosamine, CCl<sub>4</sub>: carbon tetrachloride,  
794 DMSO: dimethyl sulphoxide, Sora: sorafenib, RSL3: Ras-selective lethal small  
795 molecule 3, ALT: alanine aminotransferase, 4-HNE: 4-hydroxy-2-nonenal, H&E:  
796 hematoxylin and eosin. Values represent the mean  $\pm$  SD (n = 3, performed in  
797 triplicate). \*p < 0.05, \*\*p < 0.01, \*\*\*p < 0.001, Student's t-test (two groups) or  
798 one-way ANOVA followed by Tukey tests (five groups).  
799  
800

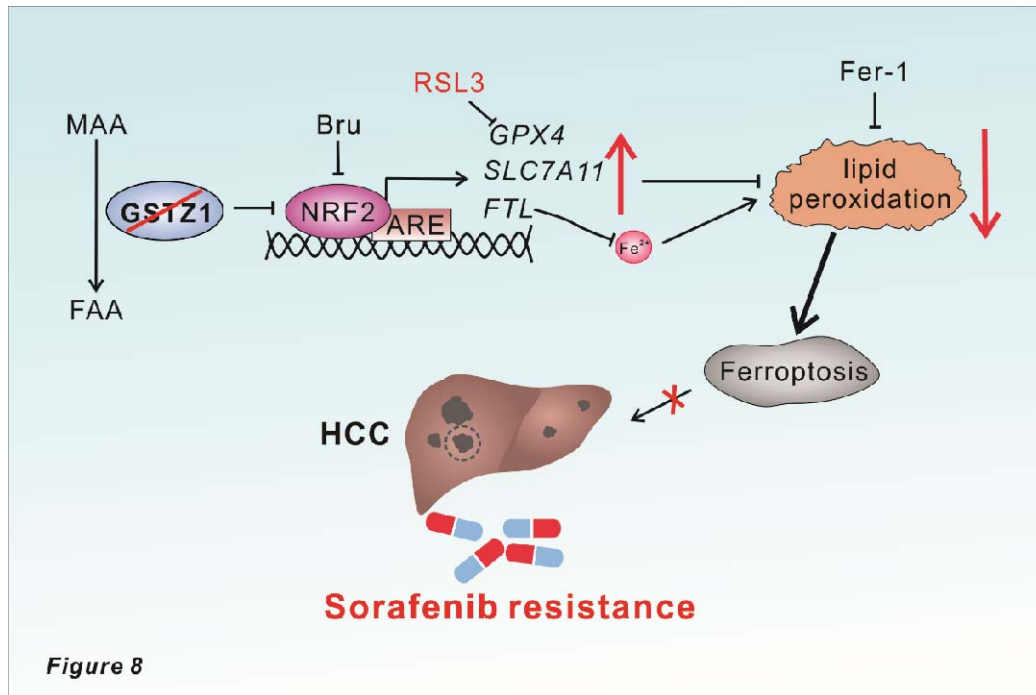

801

802 **Fig. 8** A proposed model of the resistance of GSTZ1-deficient cells to

803 sorafenib. MAA: maleylacetoacetate, FAA: fumarylacetoacetate, Bru: brusatol,

804 ARE: anti-oxidation response element. Fer-1: ferrostatin-1, HCC:

805 hepatocellular carcinoma.
